# Supplementary material for: Adverse Events and Clinical Correlates in Asian Patients with Atrial Fibrillation and Diabetes Mellitus: A Report from Asia Pacific Heart Rhythm Society Atrial Fibrillation Registry
Source: MDPI journal article supplement (doi:10.3390/jcm13051274), 2024-02-23
Supplement: s1 [file s1]

**Adverse events and clinical correlates in Asian patients with atrial fibrillation and type 2 diabetes mellitus: A report from Asia Pacific Heart Rhythm Society Atrial Fibrillation Registry.**

Tommaso Bucci, Katarzyna Nabrdalik, Alena Shantsila, Giulio Francesco Romiti, Wee-Siong Teo, Hyung-Wook Park, Wataru Shimizu, Hung-Fat Tse, Marco Proietti, Tze-Fan Chao, Gregory Y. H. Lip; Asia-Pacific Heart Rhythm Society Atrial Fibrillation Registry Investigators<sup>§</sup>.

Supplementary materials

Supplementary Table 1. Cox regression multivariable analysis for the risk of all-cause of death in patients with atrial fibrillation and diabetes.

|                           | <b>HR</b> | <b>95%CI</b> | <b>p-value</b> |
|---------------------------|-----------|--------------|----------------|
| Age                       | 1.09      | 1.07-1.11    | <0.001         |
| Female sex                | 0.99      | 0.67-1.44    | 0.908          |
| Hypertension              | 1.52      | 0.92-2.51    | 0.101          |
| Diabetes                  | 1.48      | 1.00-2.19    | 0.050          |
| Heart Failure             | 2.75      | 1.88-4.01    | <0.001         |
| Coronary artery disease   | 1.67      | 1.12-2.48    | 0.011          |
| Peripheral artery disease | 2.50      | 1.01-6.20    | 0.048          |
| Previous stroke           | 1.43      | 0.86-2.37    | 0.167          |

HR: Hazard Ratio, CI: Confidence Interval.

Supplementary Table 2. Cox regression multivariable analysis for the risk of cardiovascular death in patients with atrial fibrillation and diabetes.

|                           | <b>HR</b> | <b>95%CI</b> | <b>p-value</b> |
|---------------------------|-----------|--------------|----------------|
| Age                       | 1.08      | (1.03-1.12)  | 0.001          |
| Female sex                | 0.97      | (0.42-2.23)  | 0.937          |
| Hypertension              | 1.14      | (0.41-3.17)  | 0.805          |
| Heart Failure             | 3.77      | (1.65-8.61)  | 0.002          |
| Diabetes                  | 2.33      | (1.01-5.40)  | 0.047          |
| Coronary artery disease   | 2.52      | (1.10-5.75)  | 0.029          |
| Peripheral artery disease | 1.87      | (0.25-14.14) | 0.543          |
| Previous stroke           | 1.04      | (0.31-3.48)  | 0.954          |

HR: Hazard Ratio, CI: Confidence Interval.

Supplementary Table 3. Cox regression multivariable analysis for the risk of acute coronary syndrome or percutaneous coronary interventions in patients with atrial fibrillation and diabetes.

|                           | <b>HR</b> | <b>95%CI</b> | <b>p-value</b> |
|---------------------------|-----------|--------------|----------------|
| Age                       | 1.03      | (1.00-1.06)  | 0.091          |
| Female sex                | 0.81      | (0.40-1.62)  | 0.543          |
| Hypertension              | 2.39      | (1.03-5.57)  | 0.043          |
| Heart Failure             | 1.02      | (0.49-2.12)  | 0.951          |
| Diabetes                  | 0.95      | (0.47-1.92)  | 0.895          |
| Coronary artery disease   | 2.76      | (1.43-5.29)  | 0.002          |
| Peripheral artery disease | 1.47      | (0.20-10.9)  | 0.704          |
| Previous stroke           | 0.41      | (0.10-1.71)  | 0.221          |

HR: Hazard Ratio, CI: Confidence Interval.

Supplementary Table 4. Cox regression multivariable analysis for the risk of thromboembolic events in patients with atrial fibrillation and diabetes.

|                           | <b>HR</b> | <b>95%CI</b> | <b>p-value</b> |
|---------------------------|-----------|--------------|----------------|
| Age                       | 1.04      | (1.00-1.08)  | 0.031          |
| Female sex                | 1.49      | (0.68-3.27)  | 0.322          |
| Hypertension              | 0.86      | (0.37-1.98)  | 0.715          |
| Heart Failure             | 2.48      | (1.11-5.56)  | 0.028          |
| Diabetes                  | 1.42      | (0.60-3.37)  | 0.426          |
| Coronary artery disease   | 0.30      | (0.07-1.25)  | 0.096          |
| Peripheral artery disease | -         | -            | -              |
| Previous stroke           | 0.75      | (0.18-3.21)  | 0.701          |

HR: Hazard Ratio, CI: Confidence Interval.

Supplementary Table 5. Cox regression multivariable analysis for the risk of new or worsening heart failure in patients with atrial fibrillation and diabetes.

|                           | <b>HR</b> | <b>95%CI</b> | <b>p-value</b> |
|---------------------------|-----------|--------------|----------------|
| Age                       | 1.02      | (1.00-1.04)  | 0.053          |
| Female sex                | 1.40      | (0.90-2.18)  | 0.136          |
| Hypertension              | 1.46      | (0.86-2.46)  | 0.161          |
| Heart Failure             | 2.98      | (1.94-4.60)  | <0.001         |
| Diabetes                  | 0.90      | (0.56-1.45)  | 0.657          |
| Coronary artery disease   | 2.59      | (1.66-4.05)  | <0.001         |
| Peripheral artery disease | 3.19      | (1.16-8.80)  | 0.025          |
| Previous stroke           | 1.37      | (0.76-2.49)  | 0.297          |

HR: Hazard Ratio, CI: Confidence Interval.

Supplementary Table 6. Cox regression multivariable analysis for the risk of major bleeding in patients with atrial fibrillation and diabetes.

|                           | <b>HR</b> | <b>95%CI</b> | <b>p-value</b> |
|---------------------------|-----------|--------------|----------------|
| Age                       | 1.06      | (1.03-1.10)  | <0.001         |
| Female sex                | 1.07      | (0.58-2.00)  | 0.828          |
| Hypertension              | 1.16      | (0.57-2.39)  | 0.679          |
| Heart Failure             | 1.17      | (0.58-2.35)  | 0.661          |
| Diabetes                  | 1.91      | (1.01-3.60)  | 0.046          |
| Coronary artery disease   | 0.61      | (0.27-1.39)  | 0.238          |
| Peripheral artery disease | 3.33      | (0.79-13.94) | 0.100          |
| Previous stroke           | 1.31      | (0.55-3.14)  | 0.537          |

HR: Hazard Ratio, CI: Confidence Interval.

Supplementary Table 7. Cox regression multivariable sensitivity analysis for the risk of all-cause death in patients with atrial fibrillation and diabetes (Model 1).

|                           | <b>HR</b> | <b>95%CI</b> | <b>p-value</b> |
|---------------------------|-----------|--------------|----------------|
| Age                       | 1.09      | (1.06-1.11)  | <0.001         |
| Female sex                | 0.92      | (0.62-1.36)  | 0.663          |
| Hypertension              | 1.48      | (0.89-2.46)  | 0.130          |
| Heart Failure             | 2.53      | (1.71-3.73)  | <0.001         |
| Diabetes                  | 1.33      | (0.88-2.00)  | 0.171          |
| Coronary artery disease   | 1.48      | (0.99-2.23)  | 0.057          |
| Peripheral artery disease | 1.78      | (0.70-4.55)  | 0.225          |
| Previous stroke           | 1.60      | (0.96-2.67)  | 0.071          |
| Liver disease             | 0.84      | (0.34-2.09)  | 0.710          |
| Chronic kidney disease    | 1.77      | (1.09-2.87)  | 0.020          |
| Oral anticoagulant        | 0.46      | (0.31-0.73)  | 0.001          |

HR: Hazard Ratio, CI: Confidence Interval.



Supplementary Table 8. Cox regression multivariable sensitivity analysis for the risk of cardiovascular death in patients with atrial fibrillation and diabetes (Model 1).

|                           | <b>HR</b> | <b>95%CI</b> | <b>p-value</b> |
|---------------------------|-----------|--------------|----------------|
| Age                       | 1.07      | (1.03-1.12)  | 0.001          |
| Female sex                | 1.00      | (0.43-1.12)  | 1.000          |
| Hypertension              | 1.13      | (0.41-3.16)  | 0.811          |
| Heart Failure             | 3.72      | (1.62-8.57)  | 0.002          |
| Diabetes                  | 2.38      | (1.02-5.52)  | 0.044          |
| Coronary artery disease   | 2.50      | (1.09-5.73)  | 0.031          |
| Peripheral artery disease | 1.62      | (0.20-13.70) | 0.650          |
| Previous stroke           | 1.02      | (0.30-3.44)  | 0.977          |
| Liver disease             | -         | -            | -              |
| Chronic kidney disease    | 1.31      | (0.44-3.89)  | 0.626          |
| Oral anticoagulant        | 1.22      | (0.39-3.76)  | 0.732          |

HR: Hazard Ratio, CI: Confidence Interval.

Supplementary Table 9. Cox regression multivariable sensitivity analysis for the risk of acute coronary syndrome or percutaneous coronary interventions in patients with atrial fibrillation and diabetes (Model 1).

|                           | <b>HR</b> | <b>95%CI</b> | <b>p-value</b> |
|---------------------------|-----------|--------------|----------------|
| Age                       | 1.03      | (1.00-1.06)  | 0.107          |
| Female sex                | 0.83      | (0.41-1.68)  | 0.611          |
| Hypertension              | 2.39      | (1.02-5.62)  | 0.046          |
| Heart Failure             | 0.91      | (0.42-1.95)  | 0.798          |
| Diabetes                  | 0.99      | (0.48-2.01)  | 0.955          |
| Coronary artery disease   | 2.58      | (1.33-5.03)  | 0.005          |
| Peripheral artery disease | 1.41      | (0.19-10.66) | 0.742          |
| Previous stroke           | 0.46      | (0.11-1.92)  | 0.286          |
| Liver disease             | 1.22      | (0.29-5.15)  | 0.784          |
| Chronic kidney disease    | 1.26      | (0.46-3.41)  | 0.656          |
| Oral anticoagulant        | 0.49      | (0.24-0.99)  | 0.047          |

HR: Hazard Ratio, CI: Confidence Interval.

Supplementary Table 10. Cox regression multivariable sensitivity analysis for the risk of Thromboembolic event in patients with atrial fibrillation and diabetes (Model 1).

|                           | <b>HR</b> | <b>95%CI</b> | <b>p-value</b> |
|---------------------------|-----------|--------------|----------------|
| Age                       | 1.04      | (1.01-1.08)  | 0.027          |
| Female sex                | 1.51      | (0.68-3.31)  | 0.309          |
| Hypertension              | 0.85      | (0.37-1.98)  | 0.706          |
| Heart Failure             | 2.52      | (1.11-5.72)  | 0.026          |
| Diabetes                  | 1.43      | (0.59-3.44)  | 0.429          |
| Coronary artery disease   | 0.28      | (0.06-1.19)  | 0.084          |
| Peripheral artery disease | -         | -            | -              |
| Previous stroke           | 0.84      | (0.20-3.63)  | 0.753          |
| Liver disease             | 0.72      | (0.10-5.45)  | 0.753          |
| Chronic kidney disease    | 1.13      | (0.32-3.97)  | 0.851          |
| Oral anticoagulant        | 0.46      | (0.19-1.12)  | 0.088          |

HR: Hazard Ratio, CI: Confidence Interval.

Supplementary Table 11. Cox regression multivariable sensitivity analysis for the risk of new or worsening heart failure in patients with atrial fibrillation and diabetes (Model 1).

|                           | <b>HR</b> | <b>95%CI</b> | <b>p-value</b> |
|---------------------------|-----------|--------------|----------------|
| Age                       | 1.02      | (1.00-1.04)  | 0.093          |
| Female sex                | 1.35      | (0.86-2.11)  | 0.192          |
| Hypertension              | 1.41      | (0.83-2.39)  | 0.208          |
| Heart Failure             | 2.91      | (1.87-4.54)  | <0.001         |
| Diabetes                  | 0.87      | (0.53-1.41)  | 0.560          |
| Coronary artery disease   | 2.43      | (1.54-3.82)  | <0.001         |
| Peripheral artery disease | 2.56      | (0.90-7.28)  | 0.077          |
| Previous stroke           | 1.29      | (0.69-2.39)  | 0.426          |
| Liver disease             | 0.68      | (0.21-2.17)  | 0.513          |
| Chronic kidney disease    | 1.82      | (1.02-3.26)  | 0.044          |
| Oral anticoagulant        | 0.84      | (0.49-1.47)  | 0.548          |

HR: Hazard Ratio, CI: Confidence Interval.

Supplementary Table 12. Cox regression multivariable sensitivity analysis for the risk of major bleeding in patients with atrial fibrillation and diabetes (Model 1).

|                           | <b>HR</b> | <b>95%CI</b> | <b>p-value</b> |
|---------------------------|-----------|--------------|----------------|
| Age                       | 1.07      | (1.03-1.10)  | <0.001         |
| Female sex                | 1.08      | (0.58-2.01)  | 0.814          |
| Hypertension              | 1.17      | (0.57-2.40)  | 0.665          |
| Heart Failure             | 1.21      | (0.60-2.43)  | 0.592          |
| Diabetes                  | 1.90      | (1.01-3.58)  | 0.047          |
| Coronary artery disease   | 0.66      | (0.29-1.51)  | 0.327          |
| Peripheral artery disease | 3.86      | (0.91-16.33) | 0.066          |
| Previous stroke           | 1.19      | (0.50-2.85)  | 0.693          |
| Liver disease             | 2.11      | (0.74-5.98)  | 0.162          |
| Chronic kidney disease    | 0.57      | (0.17-1.92)  | 0.363          |
| Oral anticoagulant        | 2.31      | (0.71-7.54)  | 0.165          |

HR: Hazard Ratio, CI: Confidence Interval.

Supplementary Table 13. Cox regression multivariable sensitivity analysis for the risk of all-cause death in patients with atrial fibrillation and diabetes (Model 2).

|                           | <b>HR</b> | <b>95%CI</b> | <b>p-value</b> |
|---------------------------|-----------|--------------|----------------|
| Age                       | 1.09      | (1.06-1.12)  | <0.001         |
| Female sex                | 0.91      | (0.57-1.45)  | 0.681          |
| Hypertension              | 1.36      | (0.75-2.49)  | 0.316          |
| Heart Failure             | 2.19      | (1.37-3.48)  | 0.001          |
| Diabetes                  | 1.40      | (0.87-2.26)  | 0.164          |
| Coronary artery disease   | 1.40      | (0.86-2.30)  | 0.178          |
| Peripheral artery disease | 2.17      | (0.66-7.12)  | 0.200          |
| Previous stroke           | 1.33      | (0.74-2.40)  | 0.338          |
| Liver disease             | 0.69      | (0.21-2.21)  | 0.527          |
| Chronic kidney disease    | 1.49      | (0.81-2.74)  | 0.205          |
| Vitamin-K antagonist      | 3.83      | (2.39-6.13)  | <0.001         |

HR: Hazard Ratio, CI: Confidence Interval.

Supplementary Table 14. Cox regression multivariable sensitivity analysis for the risk of cardiovascular death in patients with atrial fibrillation and diabetes (Model 2).

|                           | <b>HR</b> | <b>95%CI</b> | <b>p-value</b> |
|---------------------------|-----------|--------------|----------------|
| Age                       | 1.08      | (1.03-1.13)  | 0.002          |
| Female sex                | 1.06      | (0.43-2.63)  | 0.905          |
| Hypertension              | 0.83      | (0.29-2.40)  | 0.728          |
| Heart Failure             | 3.11      | (1.27-7.66)  | 0.013          |
| Diabetes                  | 2.61      | (1.05-6.51)  | 0.039          |
| Coronary artery disease   | 2.12      | (0.85-5.27)  | 0.108          |
| Peripheral artery disease | 2.42      | (0.30-19.47) | 0.406          |
| Previous stroke           | 1.08      | (0.31-3.73)  | 0.905          |
| Liver disease             | -         | -            | -              |
| Chronic kidney disease    | 1.54      | (0.48-4.93)  | 0.466          |
| Vitamin-K antagonist      | 2.43      | (0.99-5.98)  | 0.053          |

HR: Hazard Ratio, CI: Confidence Interval.

Supplementary Table 15. Cox regression multivariable sensitivity analysis for the risk of acute coronary syndrome or percutaneous coronary interventions in patients with atrial fibrillation and diabetes (Model 2).

|                           | <b>HR</b> | <b>95%CI</b> | <b>p-value</b> |
|---------------------------|-----------|--------------|----------------|
| Age                       | 1.02      | (0.99-1.06)  | 0.236          |
| Female sex                | 0.52      | (0.21-1.30)  | 0.162          |
| Hypertension              | 3.04      | (1.02-9.02)  | 0.045          |
| Heart Failure             | 0.65      | (0.24-1.74)  | 0.389          |
| Diabetes                  | 0.73      | (0.30-1.77)  | 0.483          |
| Coronary artery disease   | 2.09      | (0.93-4.66)  | 0.074          |
| Peripheral artery disease | 2.57      | (0.34-19.6)  | 0.363          |
| Previous stroke           | 0.54      | (0.13-2.30)  | 0.405          |
| Liver disease             | 1.68      | (0.40-7.17)  | 0.481          |
| Chronic kidney disease    | 0.74      | (0.17-3.26)  | 0.692          |
| Vitamin-K antagonist      | 1.79      | (0.81-3.99)  | 0.153          |

HR: Hazard Ratio, CI: Confidence Interval.



Supplementary Table 16. Cox regression multivariable sensitivity analysis for the risk of thromboembolic events in patients with atrial fibrillation and diabetes (Model 2).

|                           | <b>HR</b> | <b>95%CI</b> | <b>p-value</b> |
|---------------------------|-----------|--------------|----------------|
| Age                       | 1.04      | (1.00-1.09)  | 0.076          |
| Female sex                | 2.00      | (0.79-5.06)  | 0.143          |
| Hypertension              | 0.87      | (0.33-2.32)  | 0.779          |
| Heart Failure             | 2.15      | (0.82-5.63)  | 0.120          |
| Diabetes                  | 1.36      | (0.50-3.73)  | 0.545          |
| Coronary artery disease   | 0.44      | 0.10-1.95)   | 0.278          |
| Peripheral artery disease | -         | -            | -              |
| Previous stroke           | 0.93      | (0.21-4.07)  | 0.918          |
| Liver disease             | 0.97      | (0.13-7.52)  | 0.978          |
| Chronic kidney disease    | 1.29      | (0.28-5.83)  | 0.743          |
| Vitamin-K antagonist      | 1.17      | (0.41-3.36)  | 0.768          |

HR: Hazard Ratio, CI: Confidence Interval.

Supplementary Table 17. Cox regression multivariable sensitivity analysis for the risk of new or worsening heart failure in patients with atrial fibrillation and diabetes (Model 2).

|                           | <b>HR</b> | <b>95%CI</b> | <b>p-value</b> |
|---------------------------|-----------|--------------|----------------|
| Age                       | 1.02      | (1.00-1.04)  | 0.121          |
| Female sex                | 1.05      | (0.64-1.75)  | 0.838          |
| Hypertension              | 1.24      | (0.70-2.17)  | 0.463          |
| Heart Failure             | 2.36      | (1.44-3.86)  | 0.001          |
| Diabetes                  | 0.82      | (0.47-1.42)  | 0.469          |
| Coronary artery disease   | 2.25      | (1.36-3.74)  | 0.002          |
| Peripheral artery disease | 0.82      | (0.11-5.85)  | 0.818          |
| Previous stroke           | 1.37      | (0.71-2.63)  | 0.343          |
| Liver disease             | 0.51      | (0.12-2.09)  | 0.349          |
| Chronic kidney disease    | 1.57      | (0.78-3.16)  | 0.203          |
| Vitamin-K antagonist      | 1.80      | (1.10-2.95)  | 0.020          |

HR: Hazard Ratio, CI: Confidence Interval.

Supplementary Table 18. Cox regression multivariable sensitivity analysis for the risk of major bleeding in patients with atrial fibrillation and diabetes (Model 2).

|                           | <b>HR</b> | <b>95%CI</b> | <b>p-value</b> |
|---------------------------|-----------|--------------|----------------|
| Age                       | 1.07      | (1.03-1.10)  | <0.001         |
| Female sex                | 1.10      | (0.58-2.09)  | 0.777          |
| Hypertension              | 1.30      | (0.60-2.82)  | 0.502          |
| Heart Failure             | 0.96      | (0.45-2.05)  | 0.917          |
| Diabetes                  | 2.08      | (1.09-3.99)  | 0.027          |
| Coronary artery disease   | 0.73      | (0.32-1.68)  | 0.456          |
| Peripheral artery disease | 4.18      | (0.98-17.3)  | 0.053          |
| Previous stroke           | 1.15      | (0.48-2.78)  | 0.755          |
| Liver disease             | 2.20      | (0.77-6.26)  | 0.141          |
| Chronic kidney disease    | 0.40      | (0.09-1.71)  | 0.215          |
| Vitamin-K antagonist      | 1.86      | (0.97-3.59)  | 0.064          |

HR: Hazard Ratio, CI: Confidence Interval.

Supplementary Table 19. Interaction analysis for the risk of all-cause death, cardiovascular death, and major bleeding in patients with atrial fibrillation and diabetes mellitus.

|                    |       | All-cause death  |                   |
|--------------------|-------|------------------|-------------------|
|                    |       | HR 95%CI         | p for interaction |
| Age $\geq$ 75      | DM    | 1.15 (0.73-1.80) | 0.010             |
|                    | No DM | Reference        |                   |
| Age<75             | DM    | 3.81 (1.62-8.95) |                   |
|                    | No DM | Reference        |                   |
| Males              | DM    | 2.01 (1.20-3.35) | 0.068             |
|                    | No DM | Reference        |                   |
| Females            | DM    | 0.85 (0.45-1.63) |                   |
|                    | No DM | Reference        |                   |
| Hypertension       | DM    | 1.53 (1.00-2.34) | 0.430             |
|                    | No DM | Reference        |                   |
| No hypertension    | DM    | 0.96 (0.28-3.45) |                   |
|                    | No DM | Reference        |                   |
| HF                 | DM    | 1.50 (0.85-2.65) | 0.885             |
|                    | No DM | Reference        |                   |
| No HF              | DM    | 1.37 (0.79-2.38) |                   |
|                    | No DM | Reference        |                   |
| CAD                | DM    | 2.06 (1.08-3.94) | 0.117             |
|                    | No DM | Reference        |                   |
| No CAD             | DM    | 1.16 (0.68-1.97) |                   |
|                    | No DM | Reference        |                   |
| PAD                | DM    | 0.96 (0.10-9.76) | 0.682             |
|                    | No DM | Reference        |                   |
| No PAD             | DM    | 1.46 (0.98-2.19) |                   |
|                    | No DM | Reference        |                   |
| Previous stroke    | DM    | 1.17 (0.45-3.10) | 0.924             |
|                    | No DM | Reference        |                   |
| No previous stroke | DM    | 1.47 (0.95-2.28) |                   |
|                    | No DM | Reference        |                   |
| Rhythm control     | DM    | 1.08 (0.34-3.44) | 0.726             |
|                    | No DM | Reference        |                   |
| Rate control       | DM    | 1.56 (1.03-2.37) |                   |
|                    | No DM | Reference        |                   |

Multivariable analysis adjusted for: age, sex, hypertension, heart failure, coronary artery disease, peripheral artery disease, and previous stroke.

### **Asia-Pacific Heart Rhythm Society Atrial Fibrillation Registry Investigators:**

Hong Kong: Chun-Wah Siu David (Queen Mary Hospital).

Japan: Wataru Shimizu, Kenji Yodogawa (Department of Cardiovascular Medicine Graduate School of Medicine Nippon Medical School); Hiroyuki Tsutsui, Yasushi Mukai (Department of Cardiovascular Medicine, Faculty of Medical Sciences, Kyushu University); Hirofumi Tomita, Daisuke Horiuchi (Department of Cardiology, Hirosaki University Graduate School of School of Medicine); Joji Hagii (Hirosaki Stroke and Rehabilitation Center); Kazutaka Aonuma (Division of Cardiology, University of Tsukuba Hospital); Yasuo Okumura (Division of Cardiology, Nihon University Itabashi Hospital); Masahiko Goya, Kenzo Hirao (Department of Cardiovascular Medicine, Tokyo Medical and Dental University); Masayoshi Ajioka (Division of Cardiology, Tosei General Hospital); Nobuhisa Hagiwara, Atsushi Suzuki (Department of Cardiology, Tokyo Women's Medical University); Teiichi Yamane (Department of Cardiovascular Medicine, Jikei University); Takanori Ikeda, Hitomi Yuzawa (Toho University (Faculty of Medicine)); Kazuhiro Satomi, Yoshinao Yazaki (Heart Rhythm Center, Tokyo Medical University); Keiichi Fukuda (Department of Cardiology, Keio University School of Medicine); Yoshinori Kobayashi, Norishige Morita (Division of Cardiology, Tokai University Hachioji-hospital); Toyoaki Murohara (Department of Cardiology, Nagoya University); Eiichi Watanabe, Masahide Harada (Department of Cardiology, Fujita Health University School of Medicine); Satoru Sakagami, Takahiro Saeki (National Hospital Organization Kanazawa Medical Center); Kengo Kusano, Koji Miyamoto (Department of Cardiovascular Medicine, National Cerebral and Cardiovascular Center); Shinsuke Miyazaki, Hiroshi Tada (Department of Cardiovascular Medicine, Faculty of Medical Sciences, University of Fukui); Koichi Inoue, Nobuaki Tanaka (Cardiovascular center, Sakurabashi Watanabe Hospital); Yukihiro Koretsune, Haruhiko Abe (National Hospital Organization Osaka National Hospital, (Osaka, Japan); Yasuki Kihara, Yukiko Nakano (Department of Cardiovascular Medicine, Hiroshima University Graduate School of Biomedical and Health Sciences); Akihiko Shimizu, Yasuhiro Yoshiga (Department of Medicine and Clinical Science, University Graduate School of Medicine); Tomohiro Sakamoto, Ken Okumura (Division of Cardiology, Saiseikai Kumamoto Hospital Cardiovascular Center); Naohiko Takahashi, Tetsuji Shinohara (Oita University Hospital); Kyoko Soejima (Department of Cardiovascular Medicine, Kyorin University School of Medicine); Masahiko Takagi (Kansai Medical University Medical Center); Mitsuharu Kawamura, Yumi Munetsugu (Division of Cardiology, Showa University School of Medicine)

Korea: Sung-Hwan Kim (Division of Cardiology, Department of Internal Medicine, Seoul St. Mary's Hospital, College of Medicine, The Catholic University of Korea, Seoul, South Korea); Jae-Min Shim (Division of Cardiology, Korea University College of Medicine and Korea University Medical Center, Seoul, Republic of Korea); Jae Sun Uhm (Division of Cardiology, Department of Internal Medicine, Yonjin Severance Hospital, Yonsei University College of Medicine, Yonjin, Korea); Sung Il Im (Division of Cardiology, Department of Internal Medicine, Kosin University Gospel Hospital, Kosin University College

of Medicine, Busan, Korea); Hyoung-Seob Par (Division of Cardiology, Department of Internal Medicine, Keimyung University Dongsan Hospital, Daegu, South Korea); Jun Hyung Kim (Department of Cardiology, Chungnam National University, Daejeon, Republic of Korea); Young Keun On (Division of Cardiology, Department of Medicine, Heart Vascular and Stroke Institute, Samsung Medical Center, Sungkyunkwan University School of Medicine); Il-Young Oh (Division of Cardiology, Department of Internal Medicine, Seoul National University Bundang Hospital); Seung Yong Shin (Cardiovascular & Arrhythmia Centre, Chung-Ang University Hospital, Chung-Ang University, Seoul, Korea); Jum Suk Ko (Division of Cardiology, Department of Internal Medicine, Wonkwang University School of Medicine, Iksan, Korea); Jun Beom Park (Department of Cardiology, College of Medicine, Ewha Womans University, Seoul, Korea)

Singapore: Wee-Siong Teo (National Heart Centre Singapore); Kelvin Cheok-Keng Wong (Changi General Hospital); Toon-Wei Lim (National University Hospital); David Foo (Tan Tock Seng Hospital)

Taiwan: Shih-Ann Chen (Taichung Veterans General Hospital); Shih-Ann Chen, Tze-Fan Chao, Yenn-Jiang Lin, Fa-Po Chung, Yu-Feng Hu, Shil-Lin Chang, Ta-Chuan Tuan, Jo-Nan Liao (Taipei Veterans General Hospital); Cheng-Hung Li, Jin-Long Huang, Yu-Cheng Hsieh, Tsu-Juey Wu, Ying-Chieh Liao (Taichung Veterans General Hospital); Cheng-Hung Chiang, Hsiang-Chiang Hsiao, Tung-Chen Yeh (Kaohsiung Veterans General Hospital); Wei-Siang Lin, Wen-Yu Lin (Tri-Service General Hospital); Jen-Yuan Kuo, Chong-Lie Hong, Yih-Je Wu, Ying-Siang Li, Jui-Peng Tsai, Kuo-Tzu Sung, Sheng-Hsiung Chang (Mackay Memorial Hospital).
